# Supplementary material for: Compton imaging with 99mTc for human imaging
Source: PubMed Central journal article supplement (PMC6733951; doi:10.1038/s41598-019-49130-z), 2019-09-09
Supplement: 41598_2019_49130_MOESM1_ESM.pdf [file 41598_2019_49130_MOESM1_ESM.pdf]

# Compton imaging with $^{99m}\text{Tc}$ for human imaging

**Makoto Sakai, PhD<sup>1\*</sup>, Yoshiki Kubota<sup>1</sup>, Raj Kumar Parajuli<sup>1,2</sup>, Mikiko Kikuchi<sup>1</sup>, Kazuo Arakawa<sup>1</sup>, Takashi Nakano, MD, PhD<sup>3</sup>**

<sup>1</sup> Gunma University Heavy Ion Medical Center, Graduate School of Medicine, Gunma University, 3-39-22 Showa-machi, Maebashi, Gunma, Japan

<sup>2</sup> Department of Molecular Imaging and Theranostics, National Institutes for Quantum and Radiological Science and Technology, Anagawa 4-9-1, Inage, Chiba, Japan.

<sup>3</sup> Department of Radiation Oncology, Gunma University Graduate School of Medicine, 3-39-22 Showa-machi, Maebashi, Gunma, Japan

**\*Corresponding author:**

Makoto Sakai

3-39-22 Showa-machi, Maebashi, Gunma 371-8511, Japan

Tel: +81-27-220-8378

Fax: +81-27-220-8379

E-mail: sakai-m@gunma-u.ac.jp

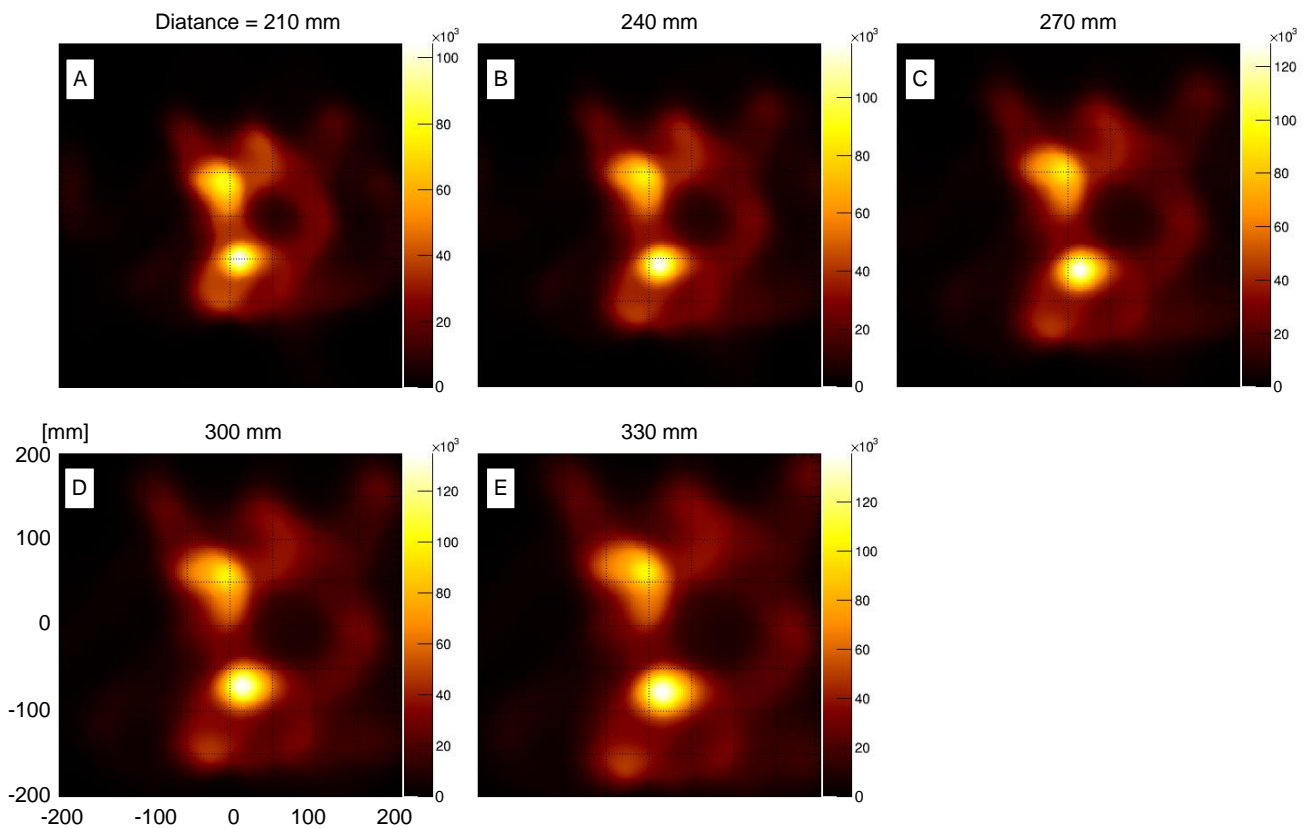

**Supplementary Figure S1.** Reconstructed images of experimental study with inaccurate distance to the imaging surface. The numerical numbers above the images expressed the distance. (C) is a re-post of Figure 7(A) and it was reconstructed with the correct distance.

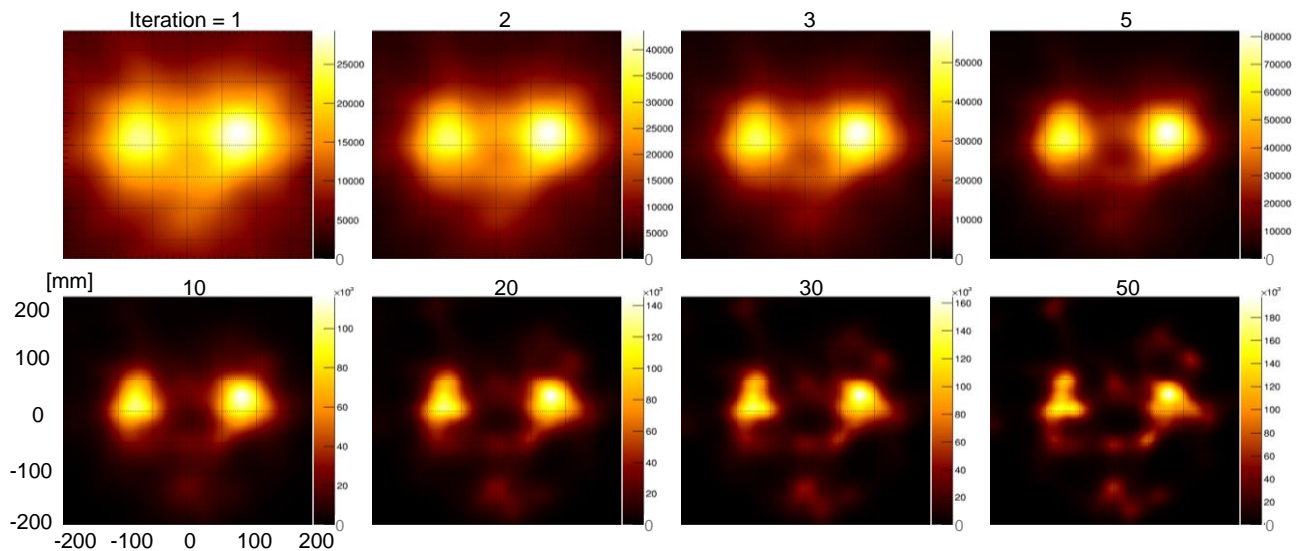

**Supplementary Figure S2.** Compton images of the simulation study reconstructed using the ML-EM algorithm. The numerical numbers above the images indicated the number of iterations.
